# Supplementary material
Source: PubMed Central journal article supplement (PMC2775979)

# Supplemental Figure 1

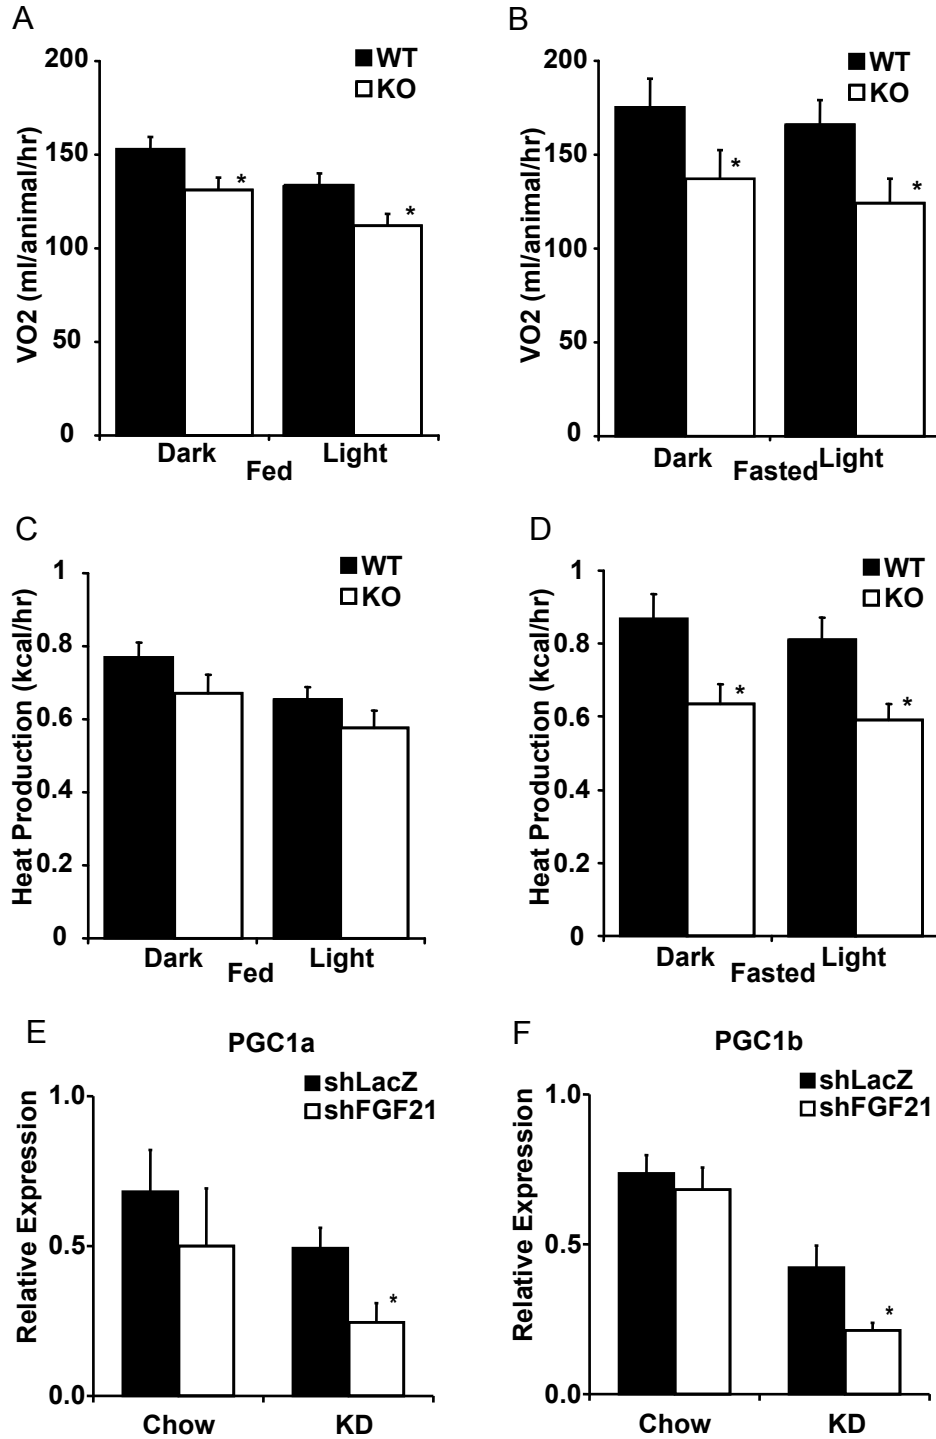

Supplement: en.2009-0532_1.pdf [file en.2009-0532_1.pdf]
